# Supplementary material for: Electronic metal–support interaction constructed for preparing sinter-resistant nano-platinum catalyst with redox property
Source: Royal Society of Chemistry journal article supplement (doi:10.1039/d1dt04142h), 2022-01-01
Supplement: d1dt04142h1.pdf [file d1dt04142h1.pdf]

## Supporting Information

# Electronic Metal-Support Interaction Constructed for Preparing Sinter-Resistant Nano-Platinum Catalyst with Redox Property

*Bin Zheng, <sup>\*a,b</sup> Jialong Duan, <sup>a</sup> and Qunwei Tang <sup>\*a</sup>*

<sup>a</sup> Institute of New Energy Technology, College of Information Science and Technology, Jinan University, Guangzhou, 510632, P. R. China.

<sup>b</sup> School of Chemistry and Chemical Engineering, Liaocheng University, Liaocheng, 252000, P. R. China.

\* Corresponding author.

E-mail addresses: zhengbin@jnu.edu.cn (B. Zheng)

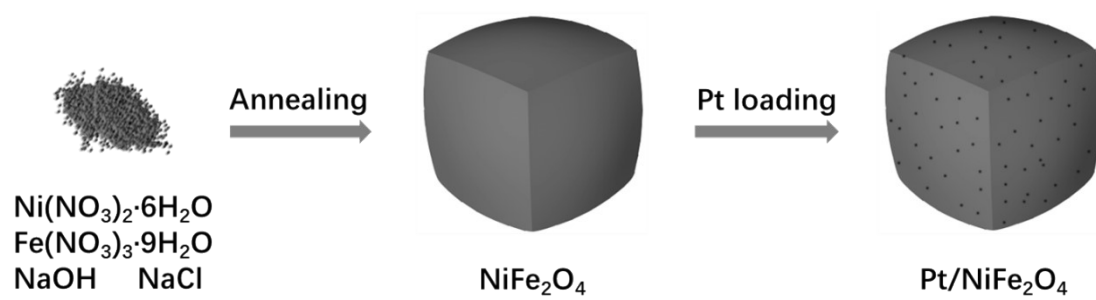

**Scheme S1.** Schematic illustration of the preparation of  $\text{NiFe}_2\text{O}_4$  and  $\text{Pt/NiFe}_2\text{O}_4$  samples.

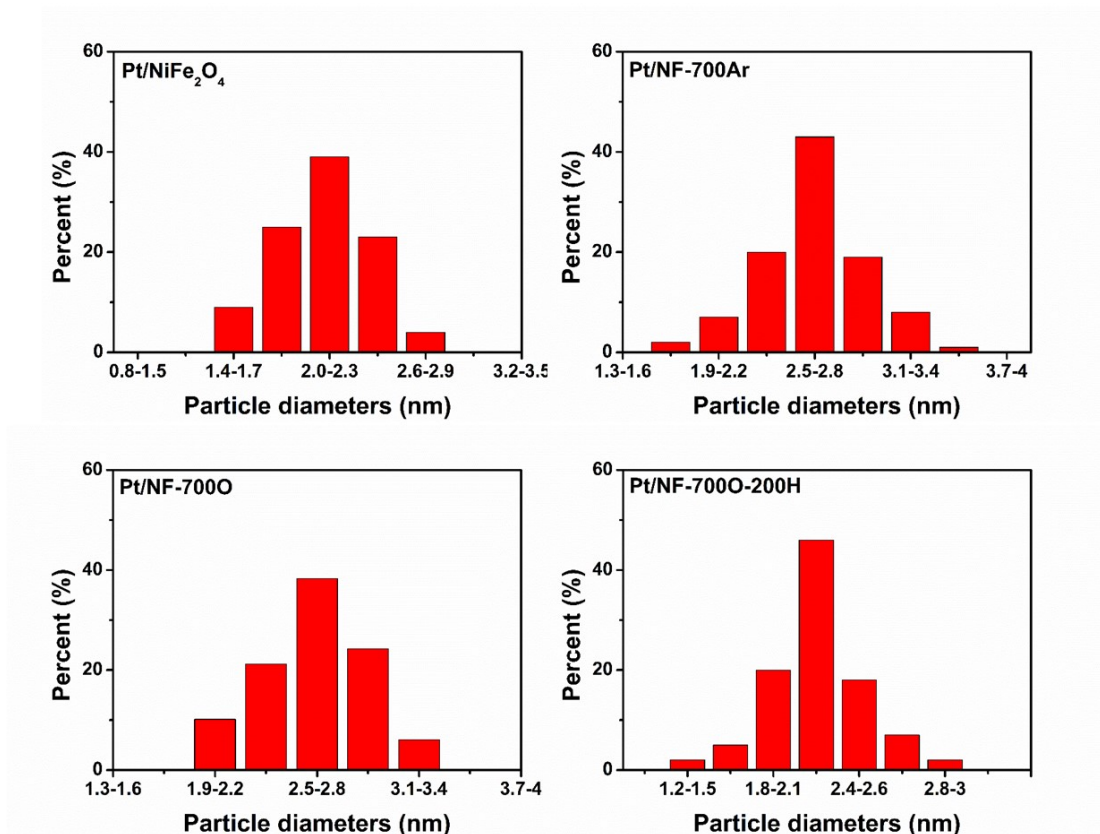

**Fig. S1** Pt NPs size distributions of Pt/NiFe<sub>2</sub>O<sub>4</sub>, Pt/NF-700Ar, Pt/NF-700O and Pt/NF-700O-200H samples.

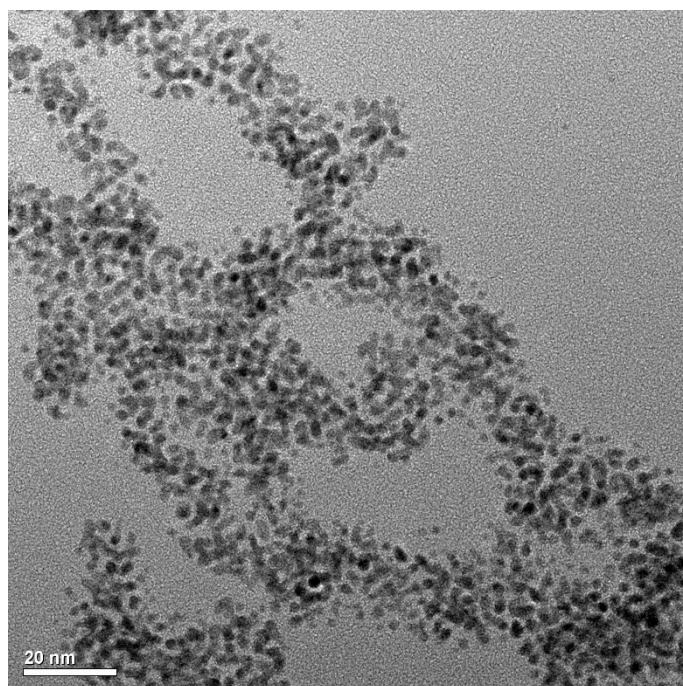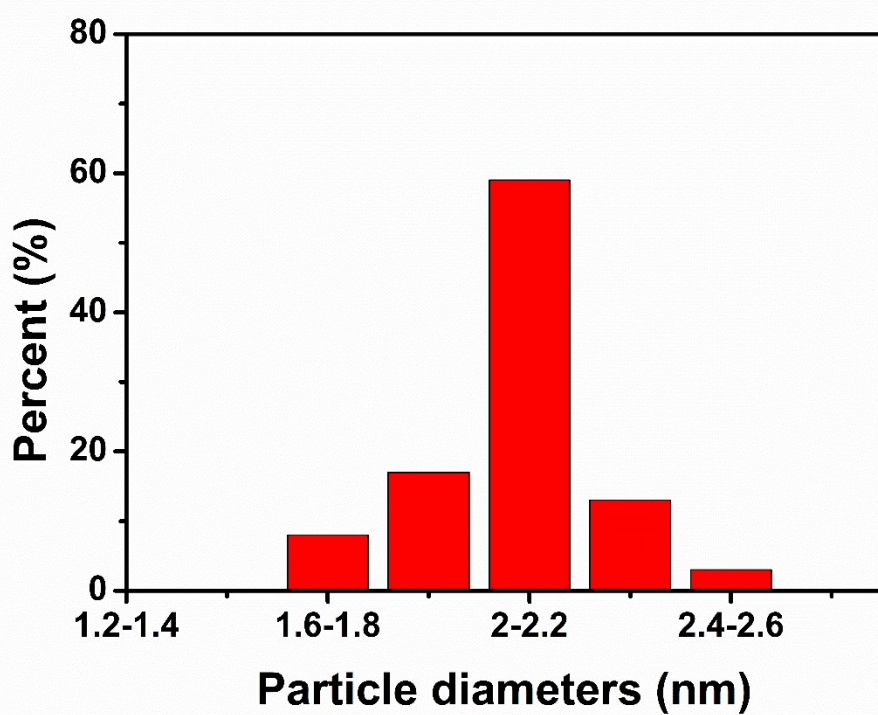

**Fig. S2** TEM image and Pt NPs size distributions of Pt colloids.

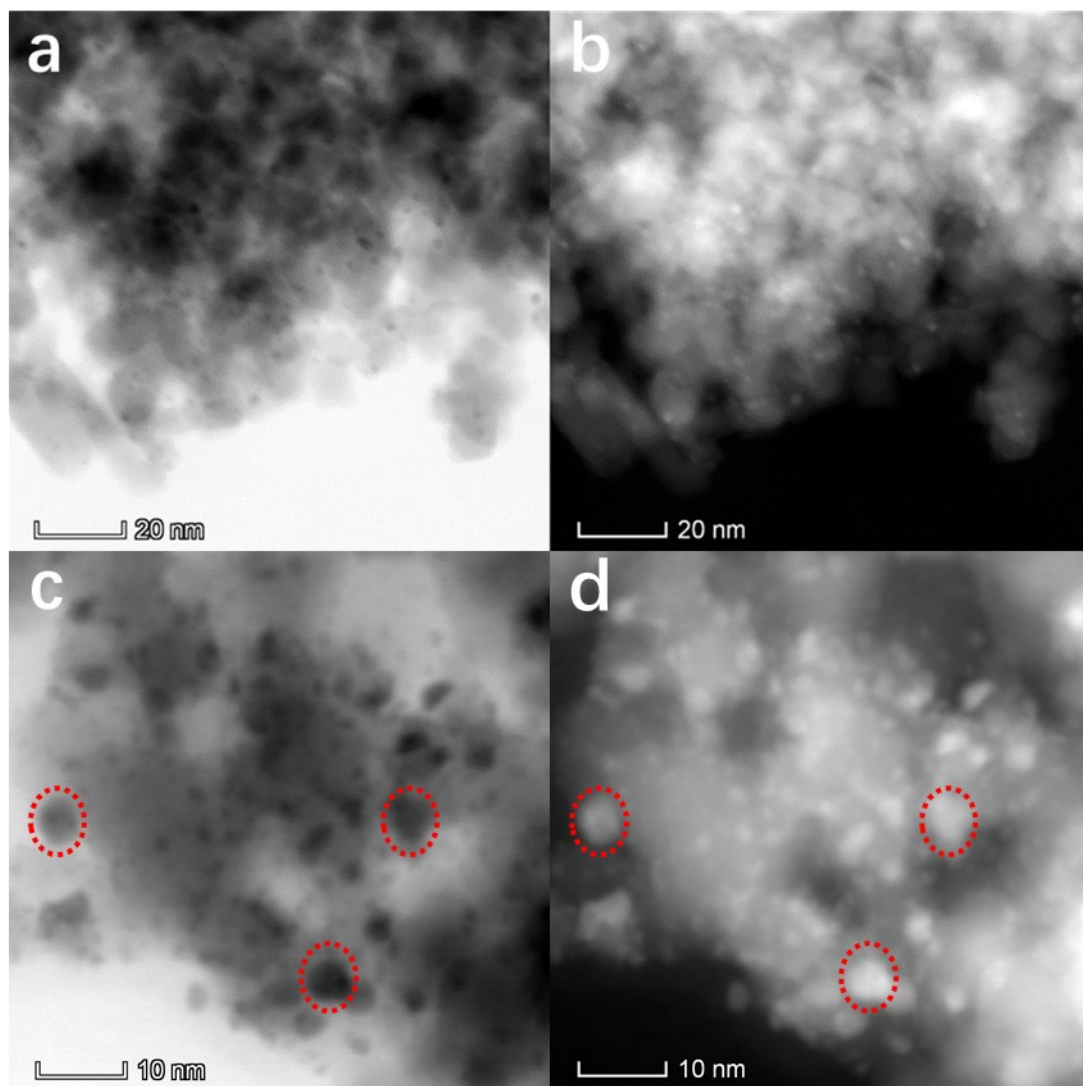

**Fig. S3** STEM images of Pt/ $\alpha$ -Fe<sub>2</sub>O<sub>3</sub> (a, b) and Pt/Fe-700O (c, d) samples.

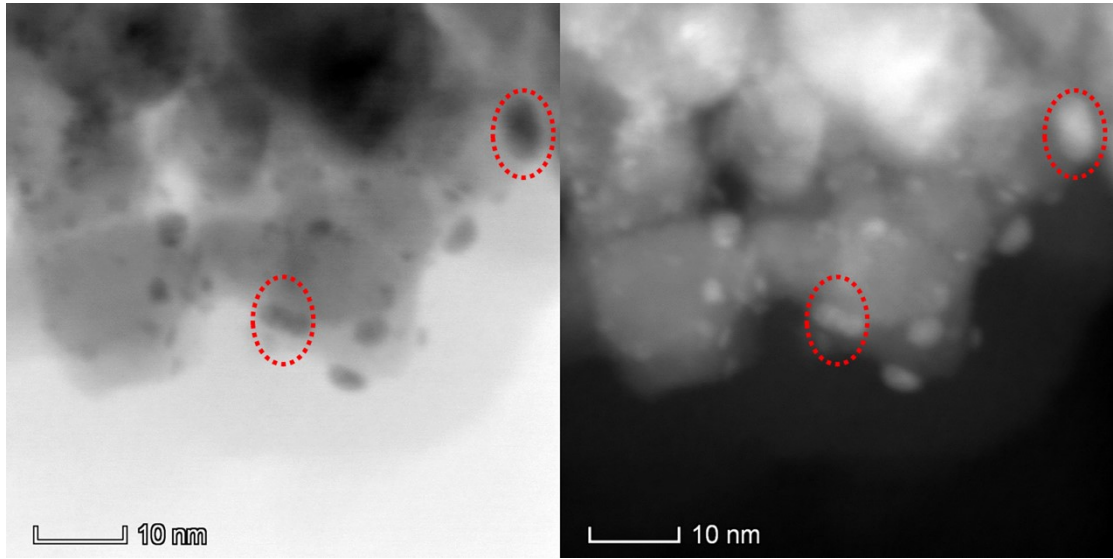

**Fig. S4** STEM images of Pt/Fe-700O after H<sub>2</sub> reduction.

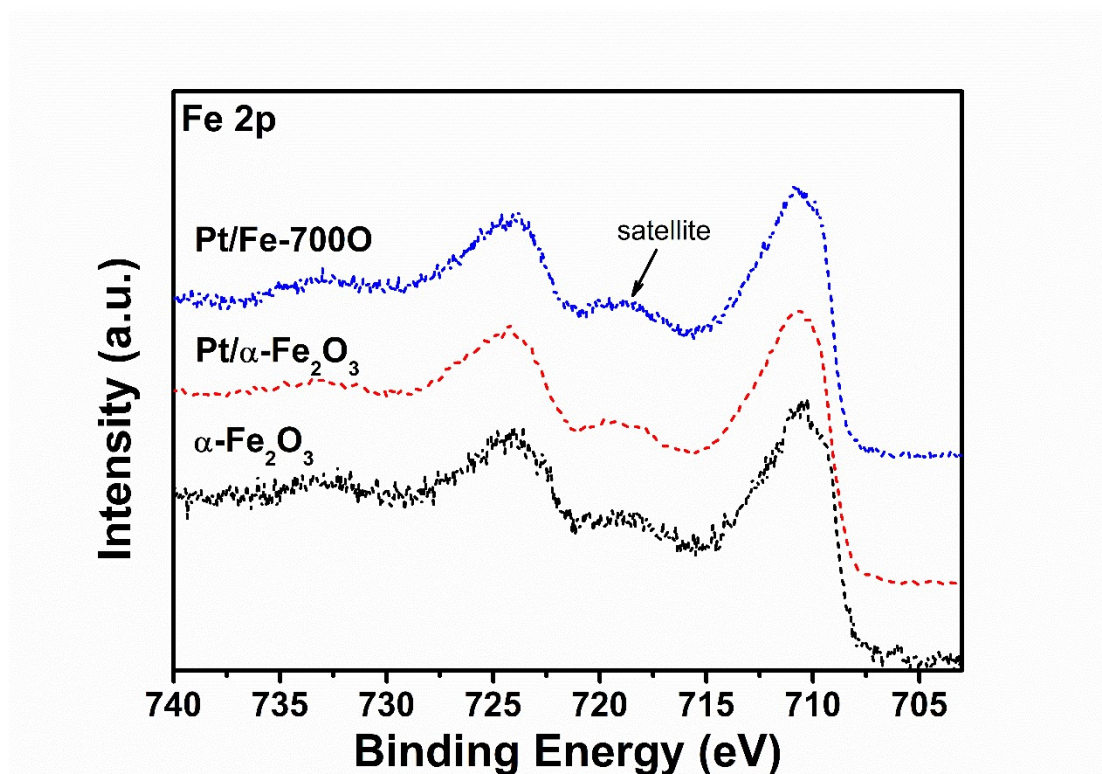

**Fig. S5** Fe 2p XPS spectra of  $\alpha$ -Fe<sub>2</sub>O<sub>3</sub> support, Pt/ $\alpha$ -Fe<sub>2</sub>O<sub>3</sub> and Pt/Fe-700O samples. C 1s at 284.6 eV is taken as reference.

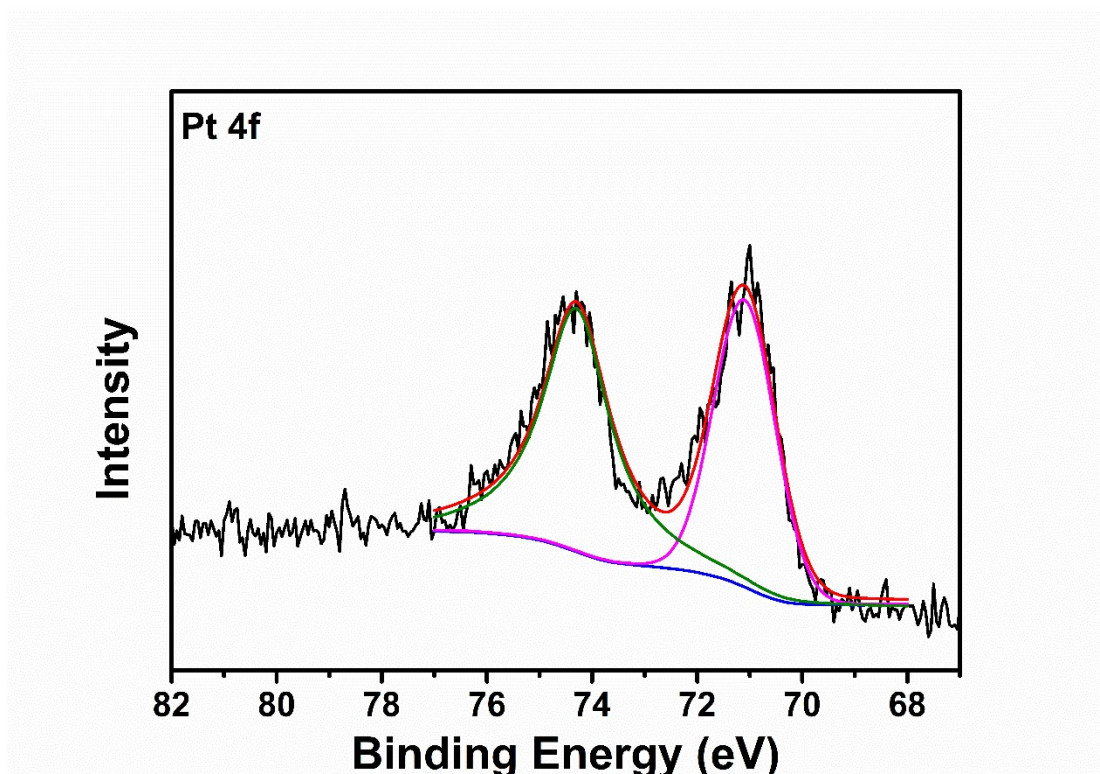

**Fig. S6** Pt 4f XPS spectrum of Pt colloid nanoparticles. C 1s at 284.6 eV is taken as reference.



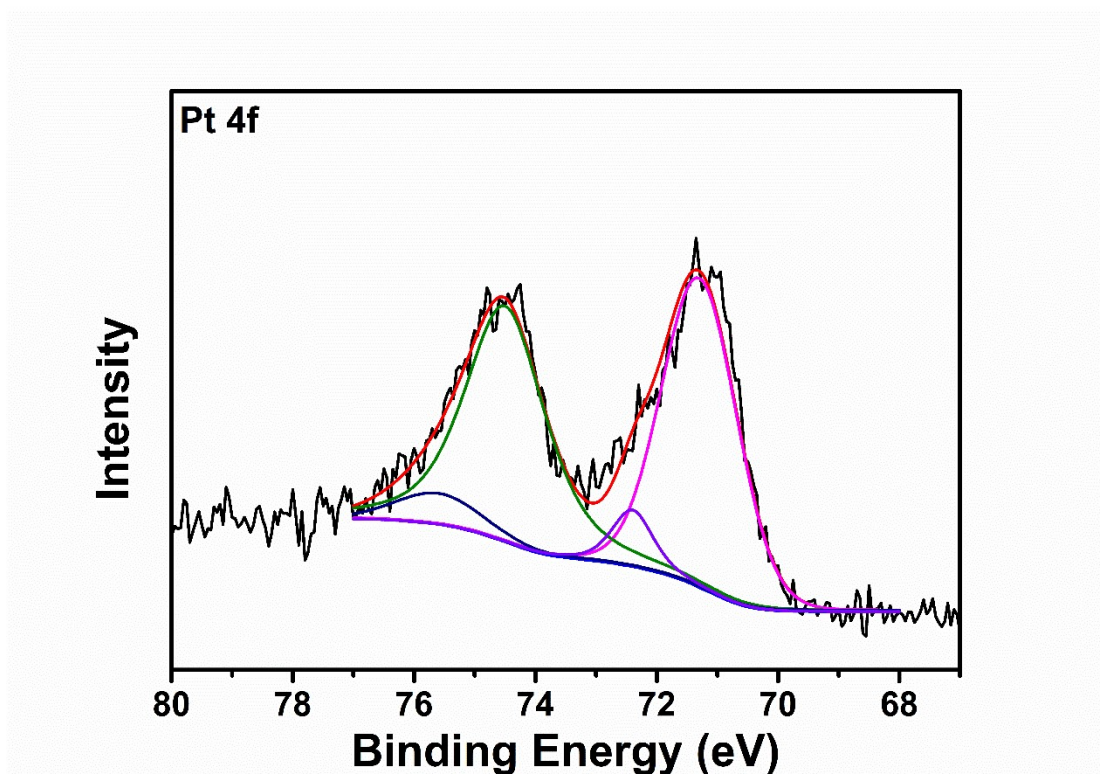

**Fig. S7** Pt 4f XPS spectrum of Pt/ $\alpha$ -Fe<sub>2</sub>O<sub>3</sub>. C 1s at 284.6 eV is taken as reference.

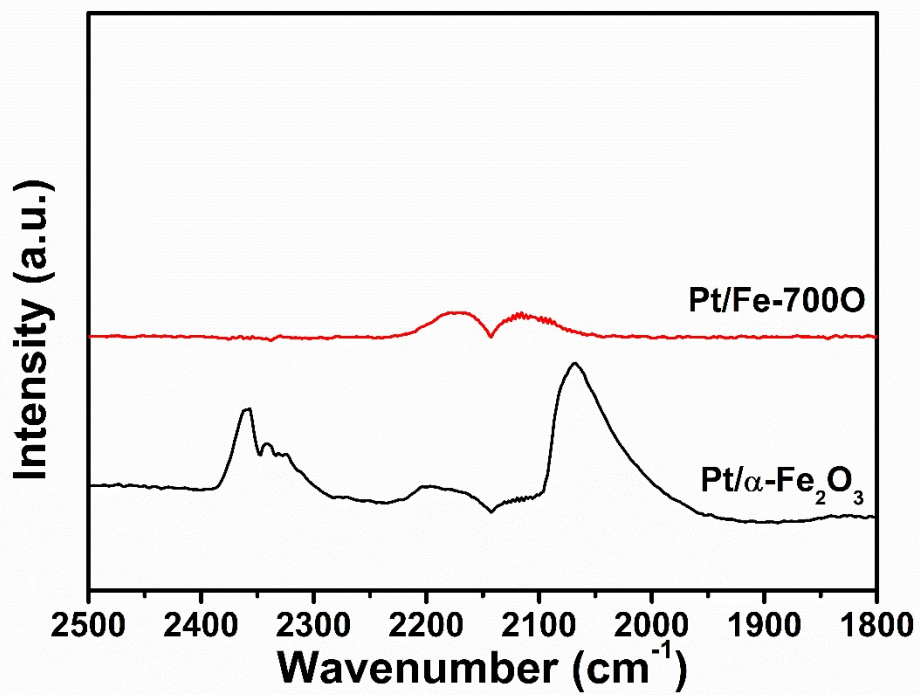

**Fig. S8** In-situ DRIFT CO adsorption spectra of Pt/ $\alpha$ -Fe<sub>2</sub>O<sub>3</sub> and Pt/ $\alpha$ -Fe<sub>2</sub>O<sub>3</sub>-7000 (Pt/Fe-7000) samples.

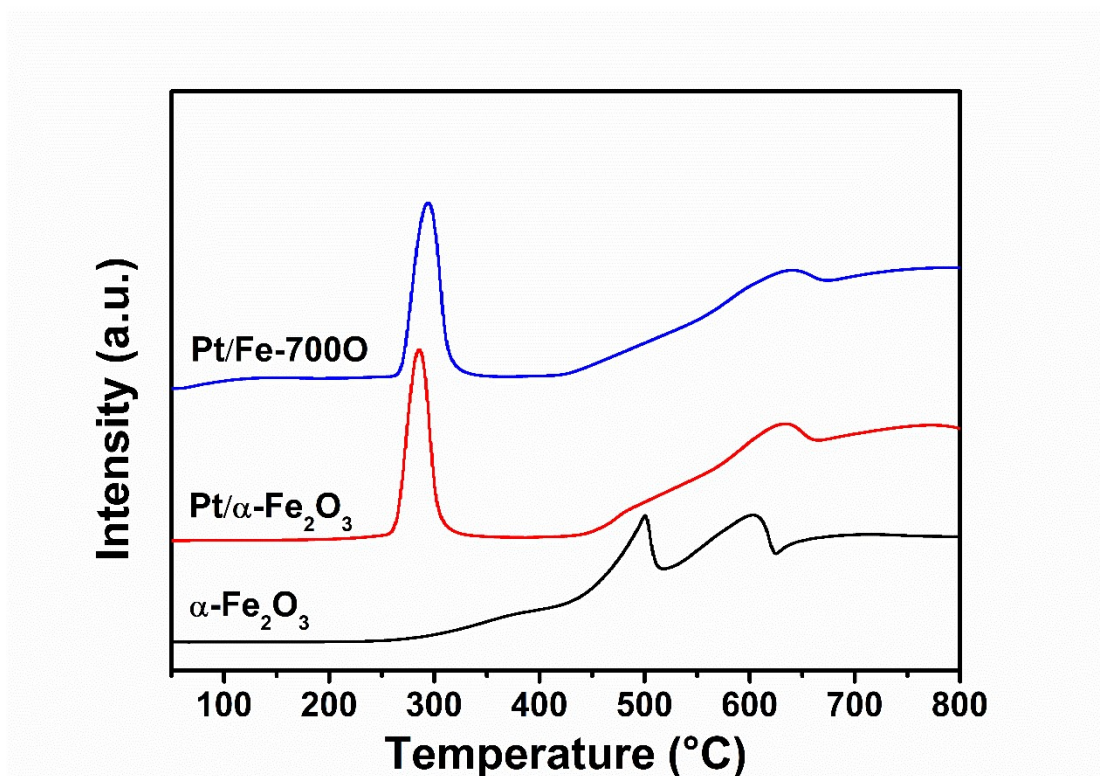

**Fig. S9** H<sub>2</sub>-TPR profiles of  $\alpha$ -Fe<sub>2</sub>O<sub>3</sub>, Pt/ $\alpha$ -Fe<sub>2</sub>O<sub>3</sub> and Pt/Fe-7000 samples.

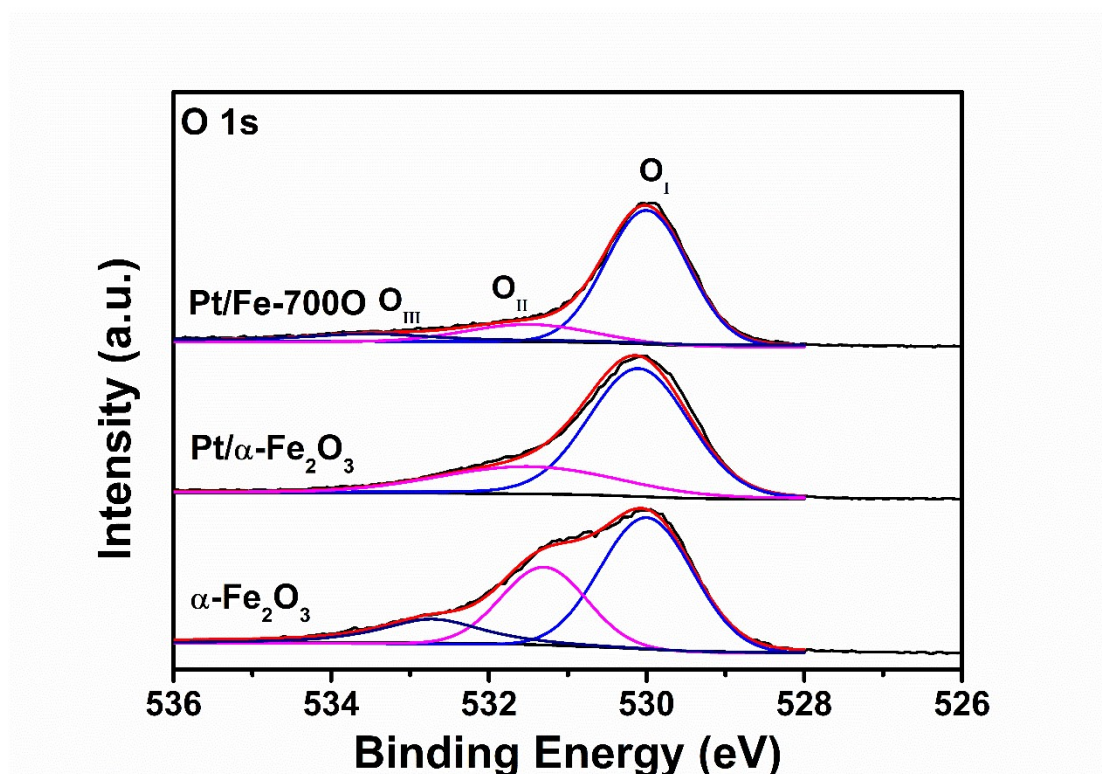

**Fig. S10** O 1s XPS spectra of  $\alpha$ -Fe<sub>2</sub>O<sub>3</sub> support, Pt/ $\alpha$ -Fe<sub>2</sub>O<sub>3</sub> and Pt/Fe-7000 samples.

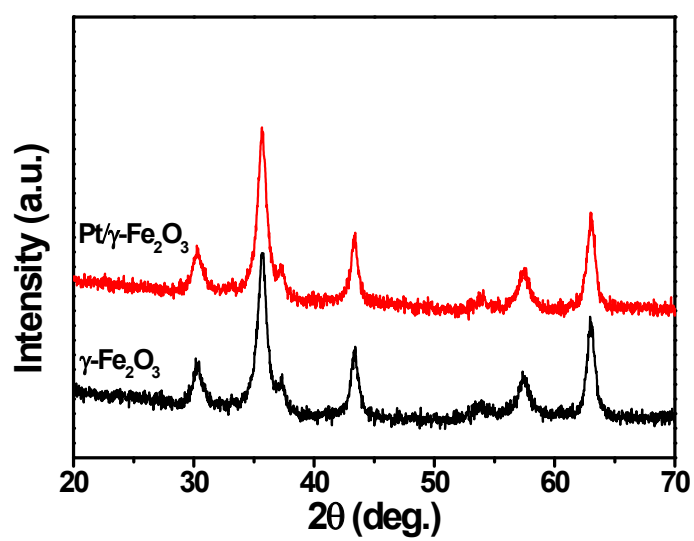

Fig. S11 XRD patterns of prepared  $\gamma$ -Fe<sub>2</sub>O<sub>3</sub> and Pt/ $\gamma$ -Fe<sub>2</sub>O<sub>3</sub> samples.

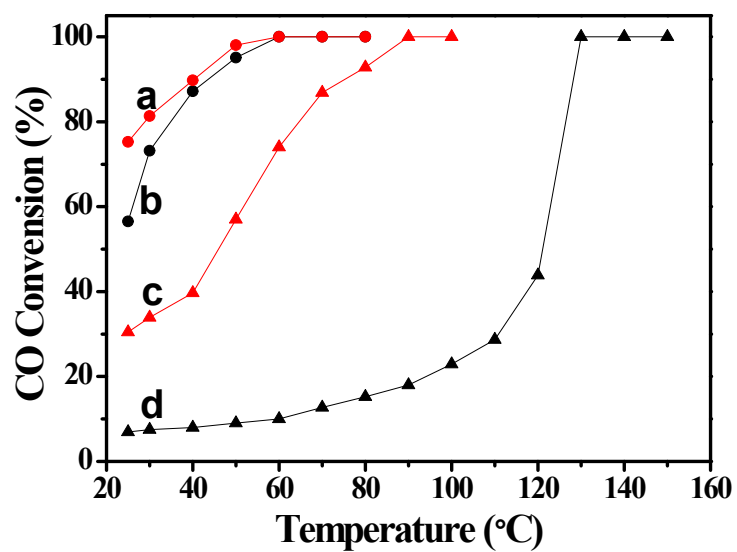

**Fig. S12** CO oxidation activities of a) Pt/ $\gamma$ -Fe<sub>2</sub>O<sub>3</sub>, b) Pt/ $\alpha$ -Fe<sub>2</sub>O<sub>3</sub> under moisture condition and c) Pt/ $\gamma$ -Fe<sub>2</sub>O<sub>3</sub>, d) Pt/ $\alpha$ -Fe<sub>2</sub>O<sub>3</sub> under dry condition. Reaction conditions: 1 vol% CO, 5 vol% O<sub>2</sub>/Ar, (1.8 vol% H<sub>2</sub>O) and Ar balance, GHSV: 60000 mL·g<sup>-1</sup>·h<sup>-1</sup>.

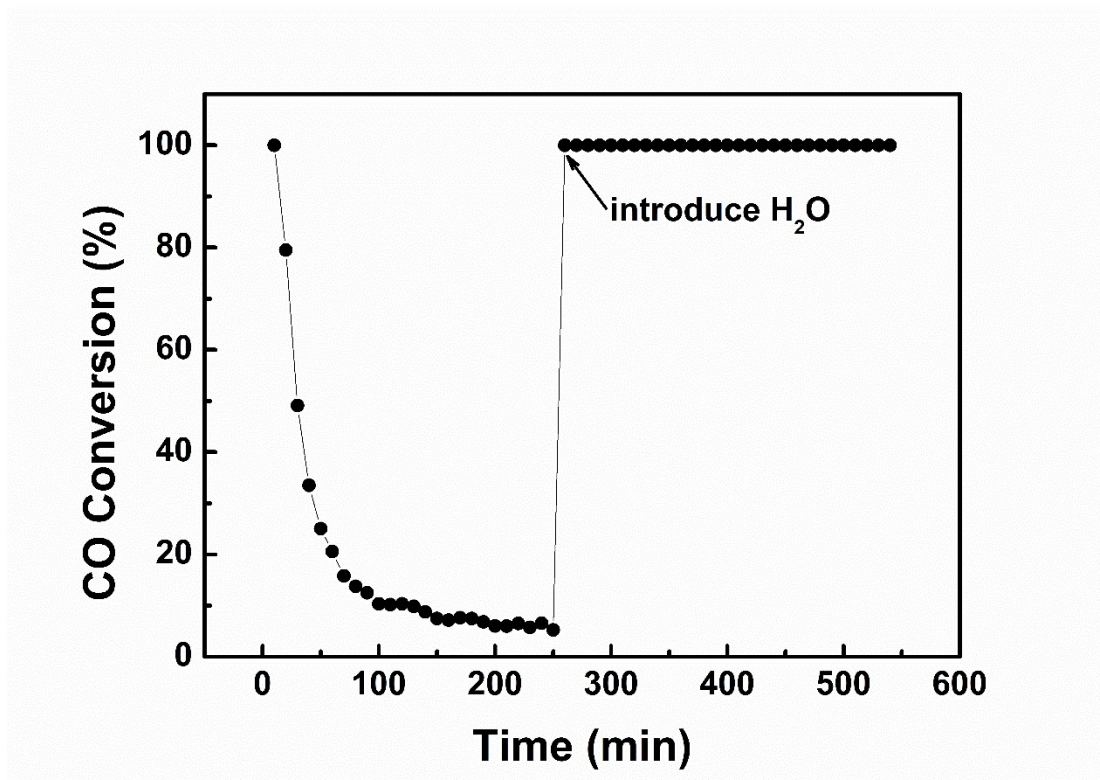

**Fig. S13** CO conversion versus time on stream over Pt/NiFe<sub>2</sub>O<sub>4</sub> in the absence and presence of water vapor.

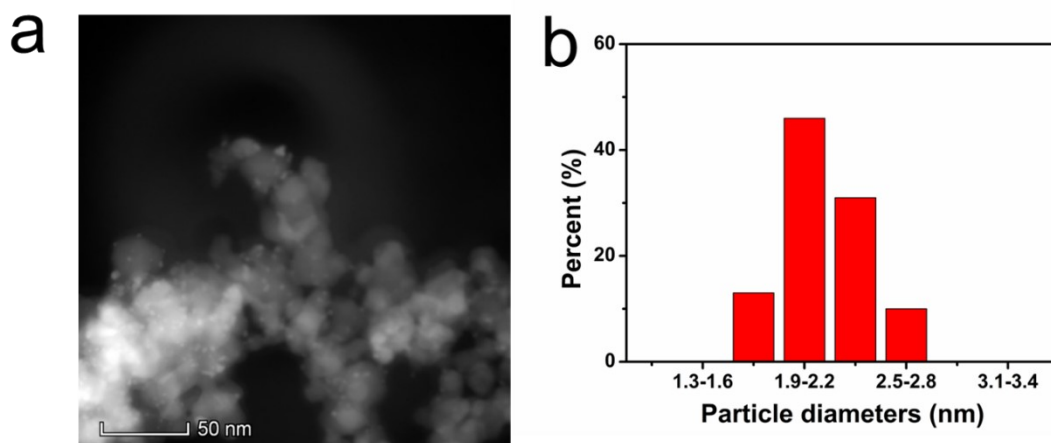

**Fig. S14** HAADF-STEM image (a) and Pt NPs size distributions (b) of Pt/NiFe<sub>2</sub>O<sub>4</sub> catalyst after storage and long-period CO catalytic oxidation process.



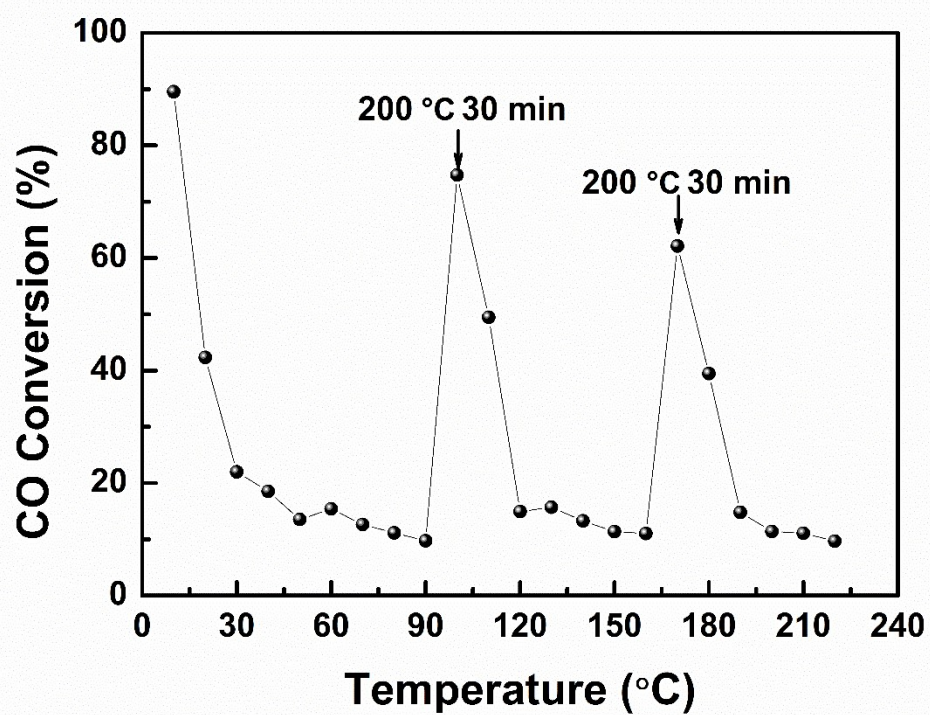

**Fig. S15** Catalytic performance of supported-Pt catalysts in CO oxidation as a function of reaction time at room temperature.

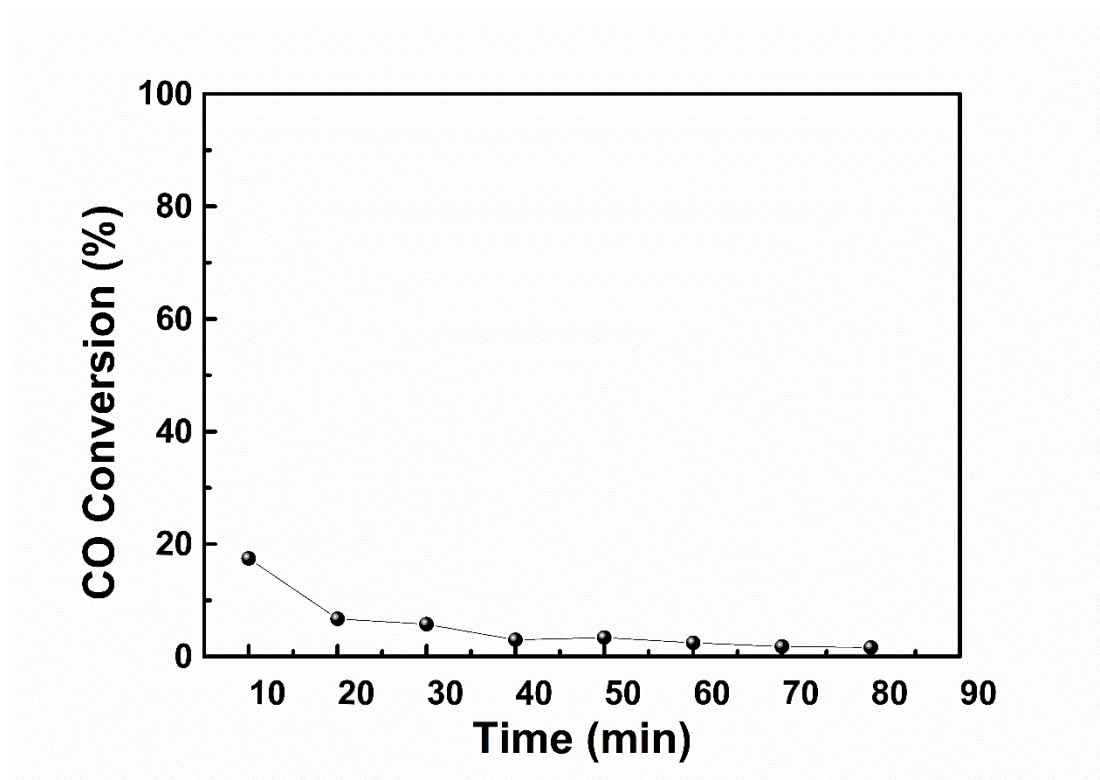

**Fig. S16** CO conversion versus time on stream over Pt/NiFe<sub>2</sub>O<sub>4</sub> under moisture atmosphere without O<sub>2</sub>.

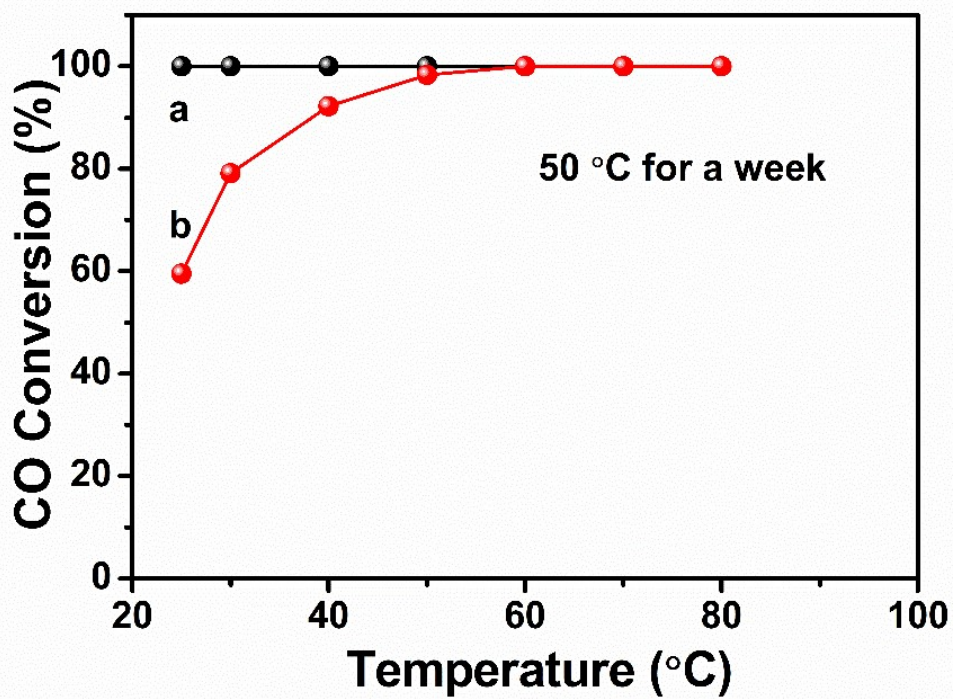

**Fig. S17** Catalytic CO oxidation activities of a) Pt/NiFe<sub>2</sub>O<sub>4</sub>, b) Pt/ferrhydrite after treated at 50 °C for a week. Reaction conditions: 1 vol% CO, 5 vol% O<sub>2</sub>/Ar, 1.8 vol% H<sub>2</sub>O and Ar balance, GHSV: 60000 mL·g<sup>-1</sup>·h<sup>-1</sup>.

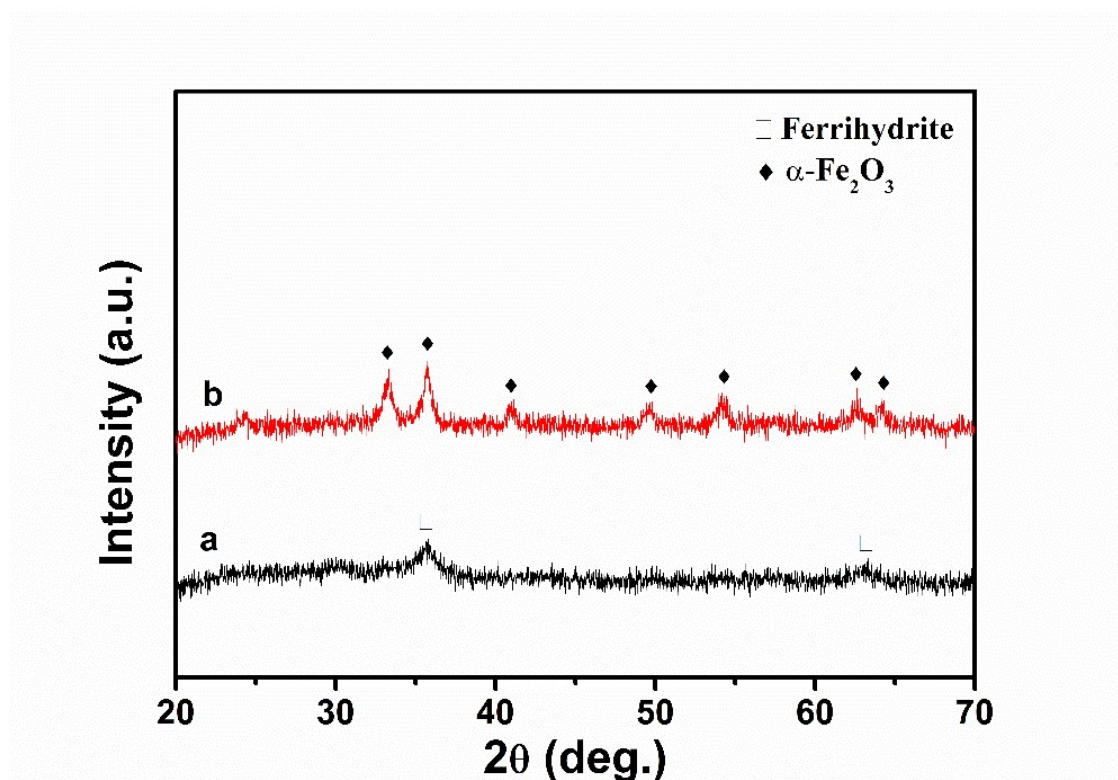

Fig. S18 XRD patterns of Pt/ferrihydrate (a) and Pt/ferrihydrate after 50 °C treatment for a week (b).

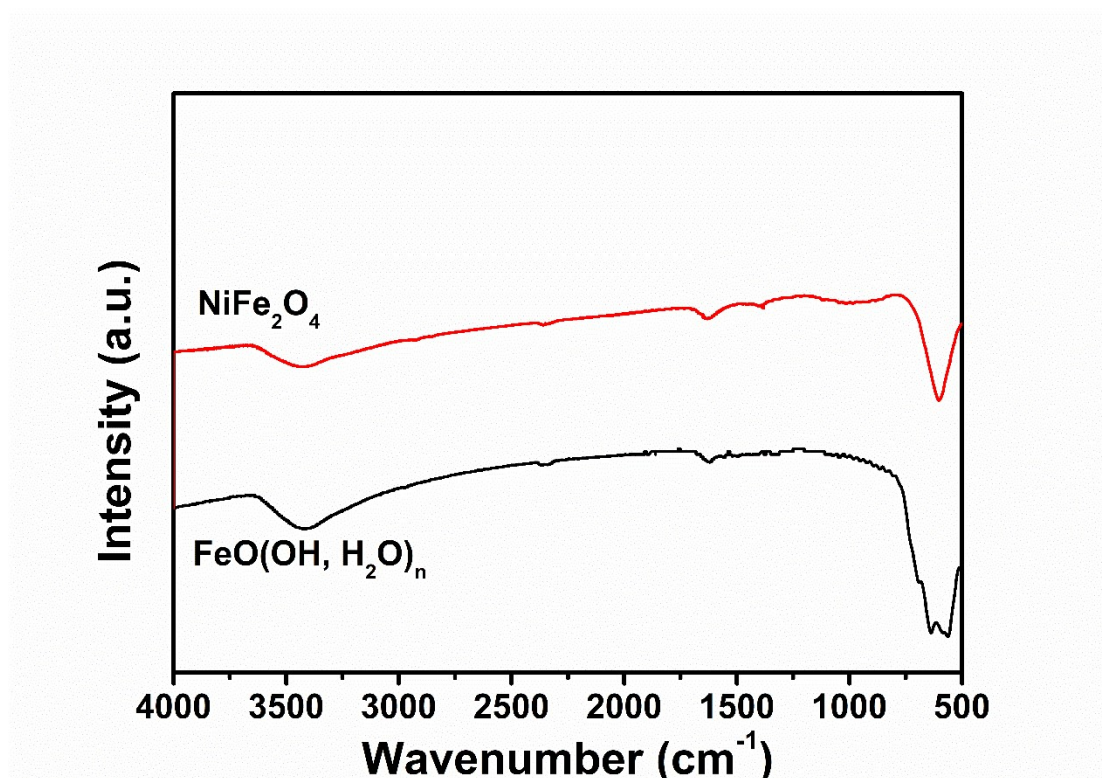

**Fig. S19** FT-IR spectra of FeO(OH, H<sub>2</sub>O)<sub>n</sub> and NiFe<sub>2</sub>O<sub>4</sub> samples.

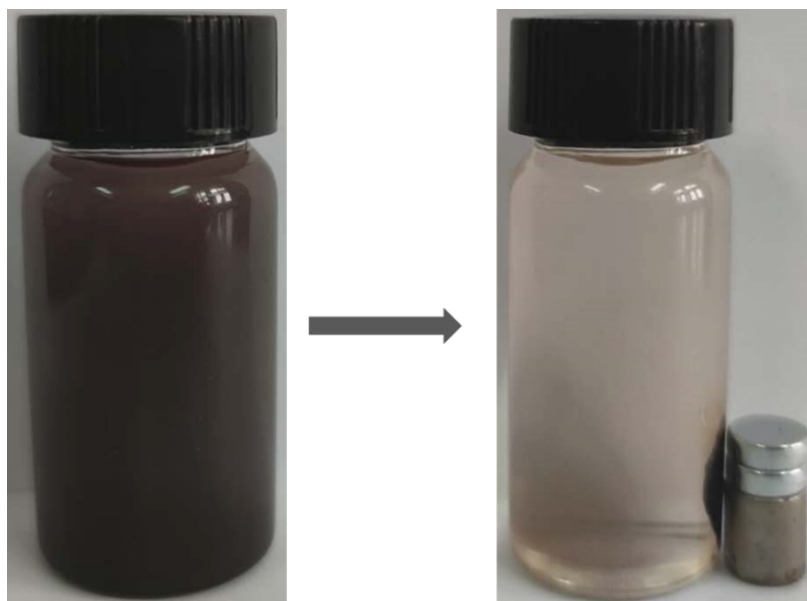

**Fig. S20** The magnetic properties of Pt/NiFe<sub>2</sub>O<sub>4</sub> sample.

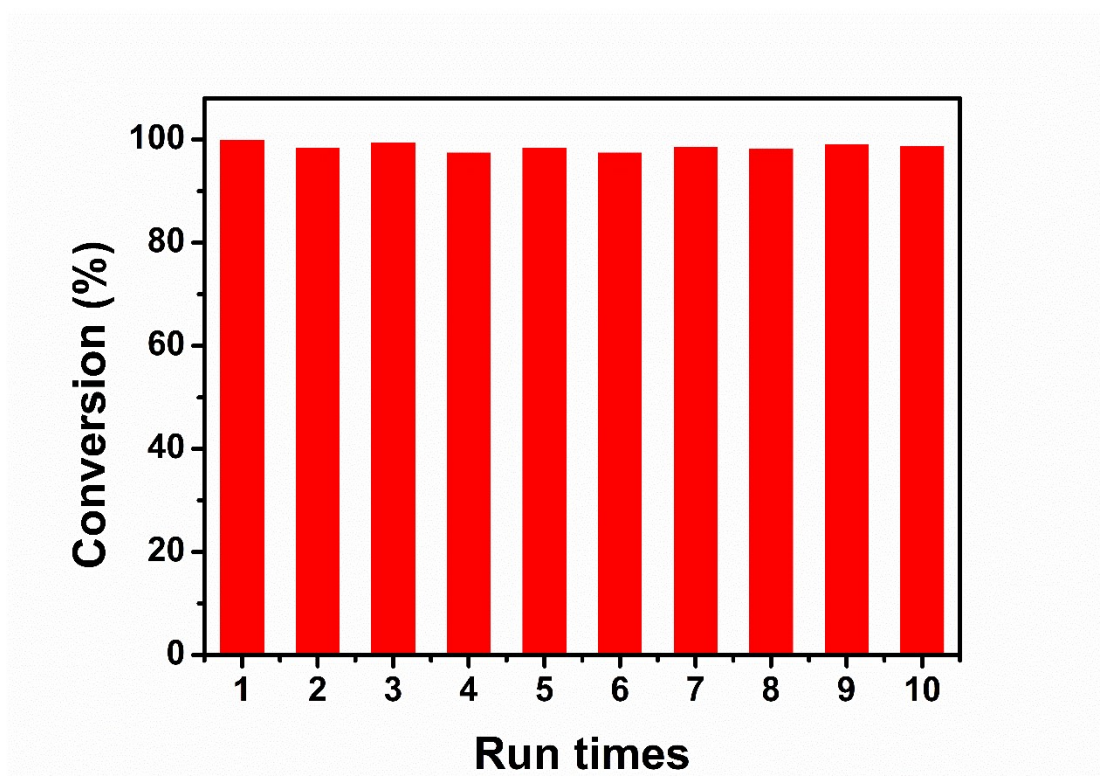

**Fig. S21** Recycling tests over the Pt/NiFe<sub>2</sub>O<sub>4</sub> catalyst. Reaction conditions:  $t = 25\text{ }^{\circ}\text{C}$ ,  $P = 5\text{ bar}$ ,  $m_{\text{cat}} = 50\text{ mg}$ ,  $1\text{ mmol}$  nitrobenzene,  $15\text{ mL}$  of toluene as solvent, reaction time:  $2\text{ h}$ .

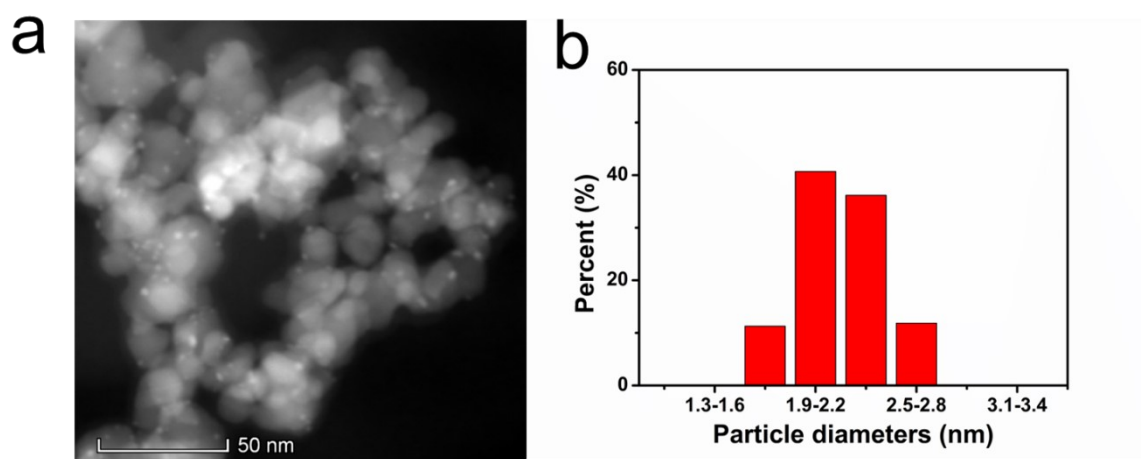

**Fig. S22** HAADF-STEM image (a) and Pt NPs size distributions (b) of Pt/NiFe<sub>2</sub>O<sub>4</sub> catalyst after ten recycling tests for hydrogenation of nitrobenzene.



**Table S1.** Texture properties of NiFe<sub>2</sub>O<sub>4</sub> and Pt/NiFe<sub>2</sub>O<sub>4</sub> samples treated at different conditions.

| Samples                             | S <sub>BET</sub> (m <sup>2</sup> ·g <sup>-1</sup> ) | Pore Volume (cm <sup>3</sup> ·g <sup>-1</sup> ) | Pore Size <sup>a</sup> (nm) |
|-------------------------------------|-----------------------------------------------------|-------------------------------------------------|-----------------------------|
| NiFe <sub>2</sub> O <sub>4</sub>    | 34.8                                                | 0.10                                            | 119.8                       |
| Pt/NiFe <sub>2</sub> O <sub>4</sub> | 36.9                                                | 0.08                                            | 94.9                        |
| Pt/NF-700Ar                         | 22.7                                                | 0.03                                            | 85.6                        |
| Pt/NF-700O                          | 17.9                                                | 0.03                                            | 84.7                        |
| Pt/NF-700O-200H                     | 31.3                                                | 0.06                                            | 82.2                        |

<sup>a</sup> Average pore size calculated from desorption branches using BJH model.

**Table S2.** Texture properties of  $\alpha$ -Fe<sub>2</sub>O<sub>3</sub> and Pt/ $\alpha$ -Fe<sub>2</sub>O<sub>3</sub> samples treated at different conditions.

| Samples                                      | S <sub>BET</sub> (m <sup>2</sup> ·g <sup>-1</sup> ) | Pore Volume (cm <sup>3</sup> ·g <sup>-1</sup> ) | Pore Size <sup>a</sup> (nm) |
|----------------------------------------------|-----------------------------------------------------|-------------------------------------------------|-----------------------------|
| $\alpha$ -Fe <sub>2</sub> O <sub>3</sub>     | 33.2                                                | 0.18                                            | 138.8                       |
| Pt/ $\alpha$ -Fe <sub>2</sub> O <sub>3</sub> | 31.2                                                | 0.17                                            | 135.6                       |
| Pt/Fe-700O                                   | 16.5                                                | 0.10                                            | 92.2                        |

<sup>a</sup> Average pore size calculated from desorption branches using BJH model.

**Table S3.** The surface element amounts of NiFe<sub>2</sub>O<sub>4</sub> and Pt/NiFe<sub>2</sub>O<sub>4</sub> samples treated at different conditions.

| Samples                                | Na   | O     | Ni    | Fe    | Pt   | Fe <sub>t</sub> <sup>3+</sup> /Fe <sub>o</sub> <sup>3+</sup> | O <sub>II</sub> /O <sub>I</sub> |
|----------------------------------------|------|-------|-------|-------|------|--------------------------------------------------------------|---------------------------------|
| NiFe <sub>2</sub> O <sub>4</sub>       | 5.43 | 58.64 | 11.52 | 24.41 |      | 1.14                                                         | 0.75                            |
| Pt/NiFe <sub>2</sub> O <sub>4</sub> -F | 4.79 | 57.69 | 12.55 | 23.80 | 1.17 | 1.10                                                         | 0.78                            |
| Pt/NiFe <sub>2</sub> O <sub>4</sub>    | 4.68 | 58.72 | 11.46 | 23.41 | 1.73 | 1.16                                                         | 0.81                            |
| Pt/NF-700Ar                            | 4.84 | 60.57 | 11.86 | 21.01 | 1.71 | 1.13                                                         | 0.79                            |
| Pt/NF-700O                             | 4.79 | 59.73 | 12.02 | 21.80 | 1.67 | 1.11                                                         | 0.76                            |
| Pt/NF-700O-200H                        | 2.66 | 56.56 | 12.57 | 26.63 | 1.58 | 1.14                                                         | 0.80                            |

**Table S4.** H<sub>2</sub> consumption of supported Pt catalyst calculated from H<sub>2</sub>-TPR profiles.

| Samples                             | H <sub>2</sub> consumption of the first peak (mmol·g <sup>-1</sup> ) | H <sub>2</sub> consumption of the second peak (mmol·g <sup>-1</sup> ) | H <sub>2</sub> consumption of the third peak (mmol·g <sup>-1</sup> ) |
|-------------------------------------|----------------------------------------------------------------------|-----------------------------------------------------------------------|----------------------------------------------------------------------|
| Pt/NiFe <sub>2</sub> O <sub>4</sub> | 1.37                                                                 | 0.19                                                                  | 6.64                                                                 |
| Pt/NF-700Ar                         | 0.51                                                                 | 1.82                                                                  | 6.10                                                                 |
| Pt/NF-700O                          | 0                                                                    | 2.32                                                                  | 7.38                                                                 |
| Pt/NF-700O-200H                     | 0.42                                                                 | 1.75                                                                  | 6.08                                                                 |
